# Supplementary material for: Electropolymerization of thienyl tethered comonomers and application towards the electrocatalytic reduction of nitrobenzene
Source: Royal Society of Chemistry journal article supplement (doi:10.1039/c8ra08603f), 2019-01-01
Supplement: c8ra08603f1.pdf [file c8ra08603f1.pdf]

## Supplementary Information

### Electropolymerization of thienyl tethered comonomers and application towards electrocatalytic reduction of nitrobenzene

Abbasriyaludeen Abdul Raheem,<sup>a,c</sup> Sivalingam Gopi,<sup>b</sup> Murugavel Kathiresan<sup>\*b,c</sup> and Chandrasekar Praveen<sup>\*a,c</sup>

<sup>a</sup>Functional Materials Division, <sup>b</sup>Electro-Organic Division

CSIR-Central Electrochemical Research Institute, Karaikudi-630003, Tamil Nadu, India

[\\*kathiresan.murugavel@gmail.com](mailto:kathiresan.murugavel@gmail.com); [chandrasekar.praveen@gmail.com](mailto:chandrasekar.praveen@gmail.com)

#### Contents

|                                                              |     |
|--------------------------------------------------------------|-----|
| Instruments and measurements                                 | S2  |
| <sup>1</sup> H & <sup>13</sup> C NMR spectra of <b>3a-3f</b> | S3  |
| Cyclic Voltammograms of monomers <b>3a-f</b>                 | S12 |
| Electrochromicity of monomers <b>3a-f</b>                    | S13 |
| FTIR spectra of <b>3a-3f</b> and <b>4a-4f</b>                | S14 |
| UV-vis spectra of <b>3a-3f</b> as thin film                  | S15 |
| UV-vis spectra of <b>4a-4f</b>                               | S17 |
| Photoluminescence spectra of <b>4a-4f</b>                    | S19 |
| SEM images of Polymers <b>4a-4f</b>                          | S20 |
| AFM topographic and height profile images of <b>4a-4f</b>    | S22 |
| Variations of current vs square root of scan rate            | S26 |

## Instruments and measurements

The morphological structures of the prepared samples were captured using Scanning Electron Microscope (SEM) of TESCAN, VEGA 3 with Bruker Detector. FTIR analysis was carried out on a BRUKER - TENSOR 27 (Optik GmbH) using RT DLaTGS (Varian) Detector. UV-Vis spectra were recorded on a Hewlett-Pacard 8453 spectrometer. PL Fluorescence was recorded in Jasco spectrofluorometer (FP-8500). Cyclic voltammetry was carried on an autolab PGSTAT 302N workstation at room temperature in a standard three-electrode cell. ITO/GC electrode was used as a working electrode, Pt was used as a counter electrode and Ag/AgCl/KCl (3 M) was used as a reference electrode. The electrochemical polymerization was studied at room temperature using DCM and 0.1 M TBA.PF<sub>6</sub> as supporting electrolyte at a scan rate of 50 mVs<sup>-1</sup>. ITO (300 mm × 300 mm × 1.1 mm), Resistivity: 8Ω. For all cyclic voltammetric experiments, 5 mg of the monomer was dissolved in 5 mL supporting electrolyte. Electrochemical polymerisation of hybrid thiophene based monomers was carried out in a three electrode set up using Autolab Potentiostat at room temperature using 10 times higher concentration as mentioned above in DCM and 0.1 M TBA.PF<sub>6</sub> as supporting electrolyte. Initially cyclic voltammograms were recorded for the monomers and based on the CV, oxidation potentials for constant potential electrolysis was fixed. All the bulk electrolysis was carried out on ITO electrode (onset potential + 200 mV) to obtain polymer films on the transparent electrode for preliminary electrochromism studies. Thick films of thiophene polymers were obtained on ITO electrodes, after polymerisation, the electrode was removed, rinsed and carefully dried. It was then subjected to electrochemical characterisation, AFM and SEM morphological analysis.

| S.No | Polymer   | No. of Cycles |
|------|-----------|---------------|
| 1    | <b>4a</b> | 10            |
| 2    | <b>4b</b> | 12            |
| 3    | <b>4c</b> | 25            |
| 4    | <b>4d</b> | 10            |
| 5    | <b>4e</b> | 25            |
| 6    | <b>4f</b> | 10            |
| 7    | <b>4g</b> | 14            |
| 8    | <b>4h</b> | 12            |

### $^1\text{H}$ & $^{13}\text{C}$ NMR Spectrum of Compound **3a**

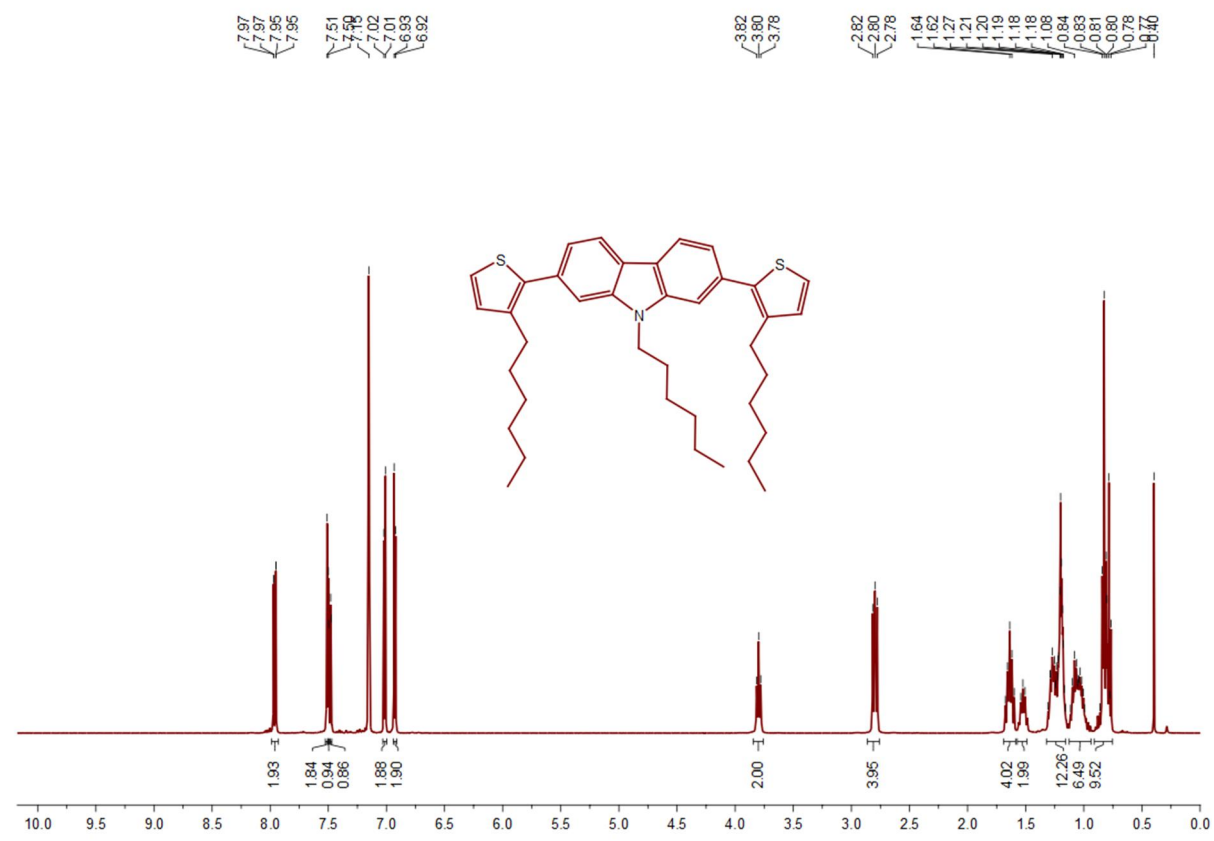

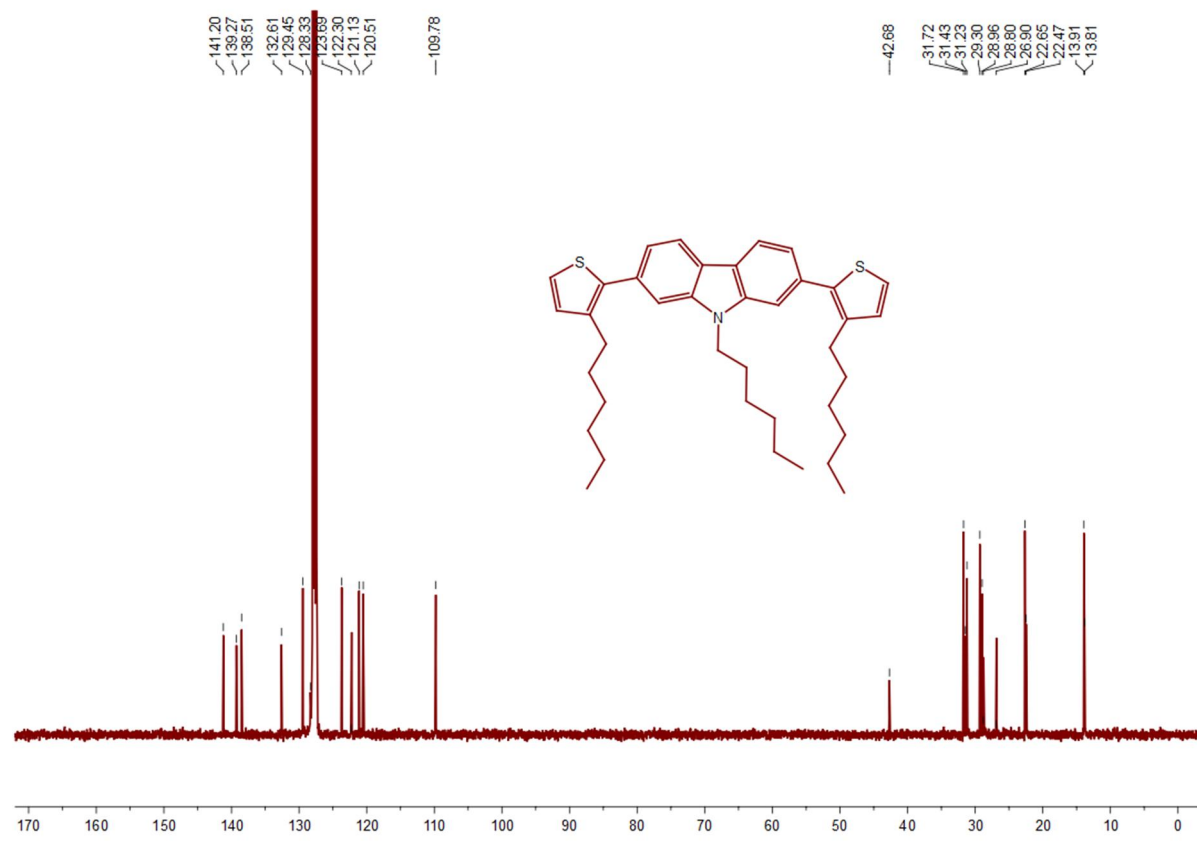

$^1\text{H}$  &  $^{13}\text{C}$  NMR Spectrum of Compound **3b**

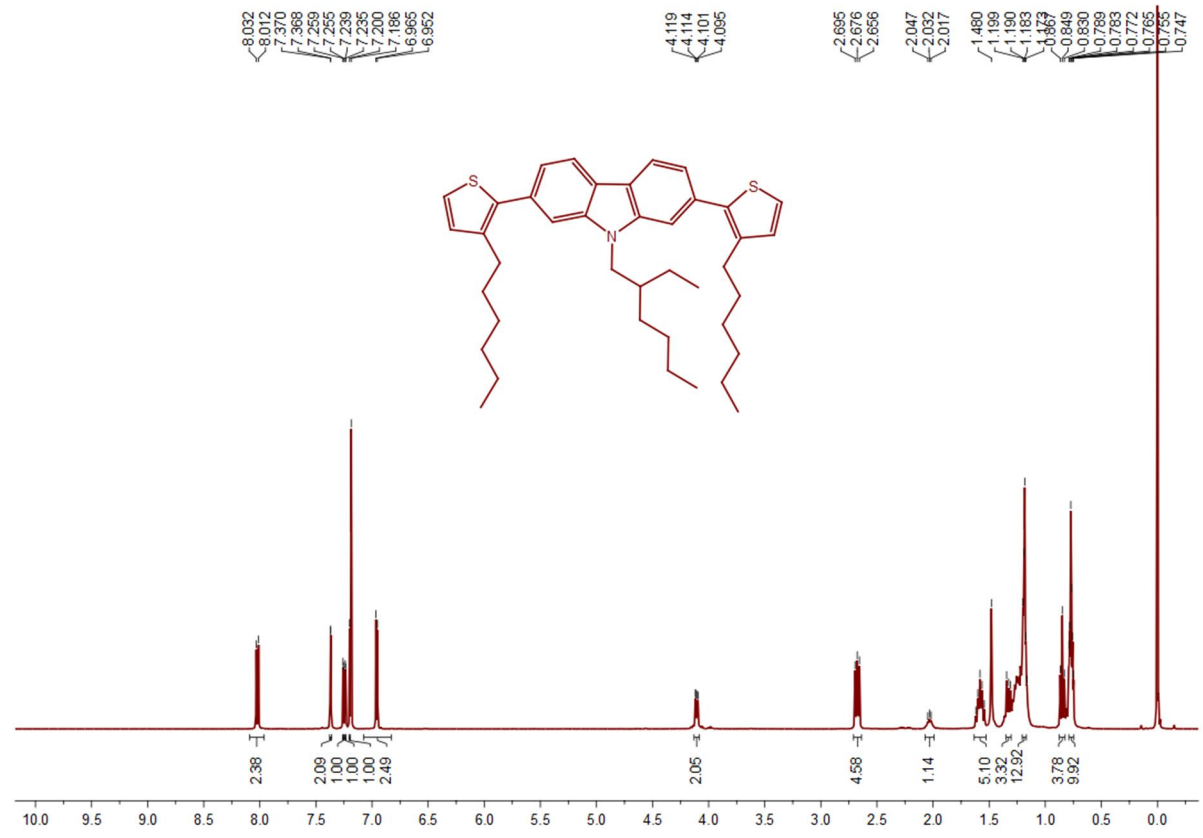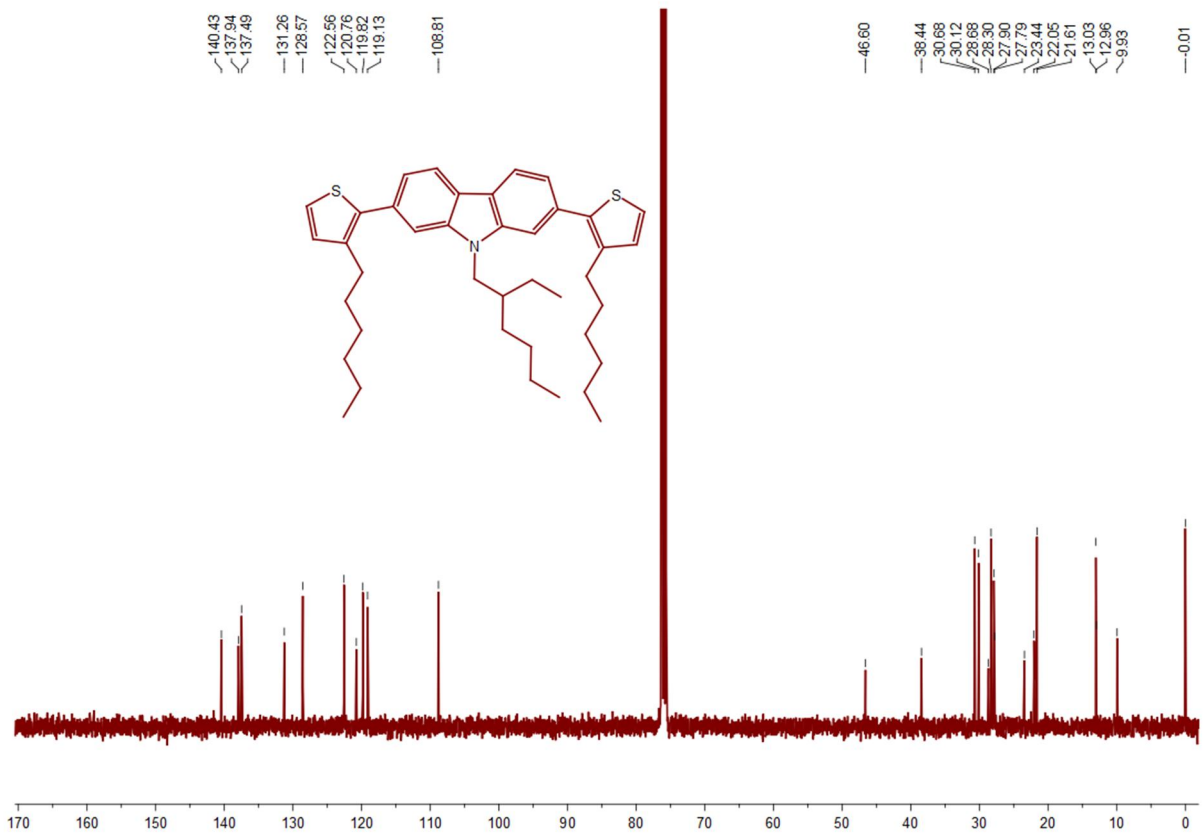

**<sup>1</sup>H & <sup>13</sup>C NMR Spectrum of Compound 3c**

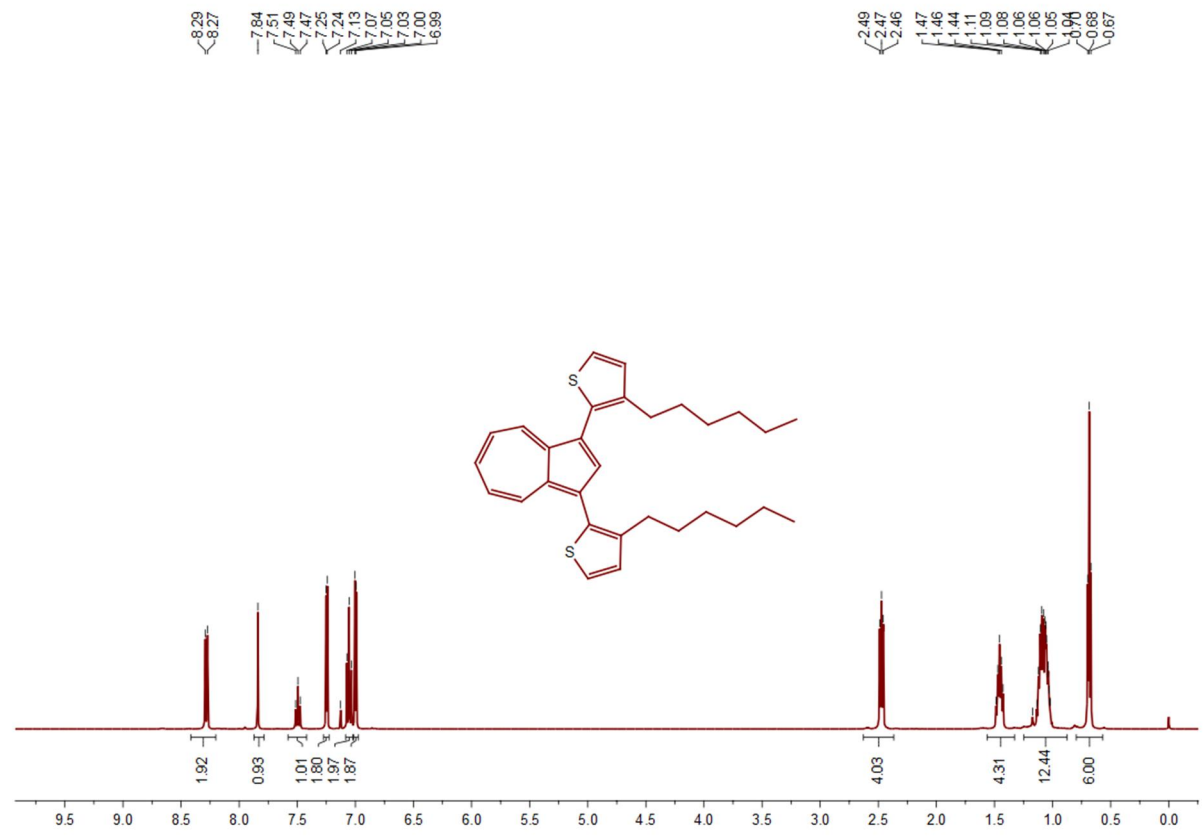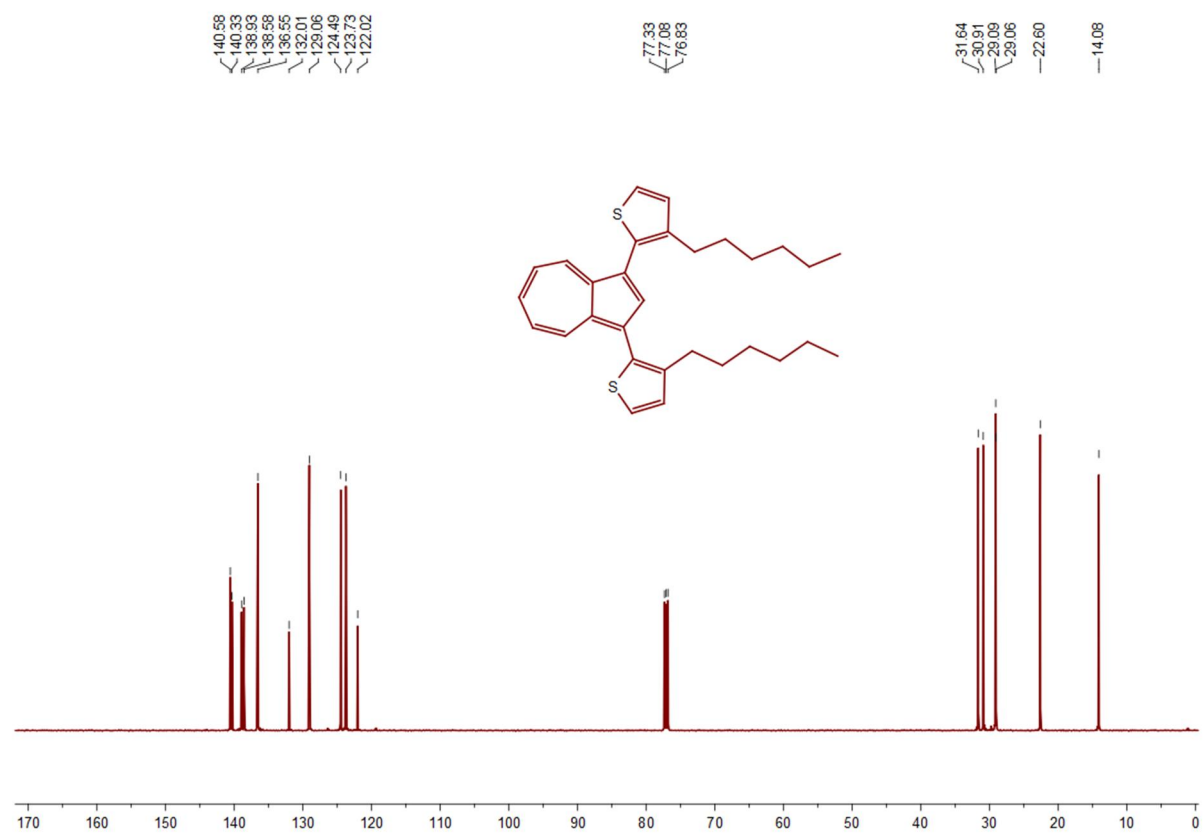

<sup>1</sup>H & <sup>13</sup>C NMR Spectrum of Compound **3d**

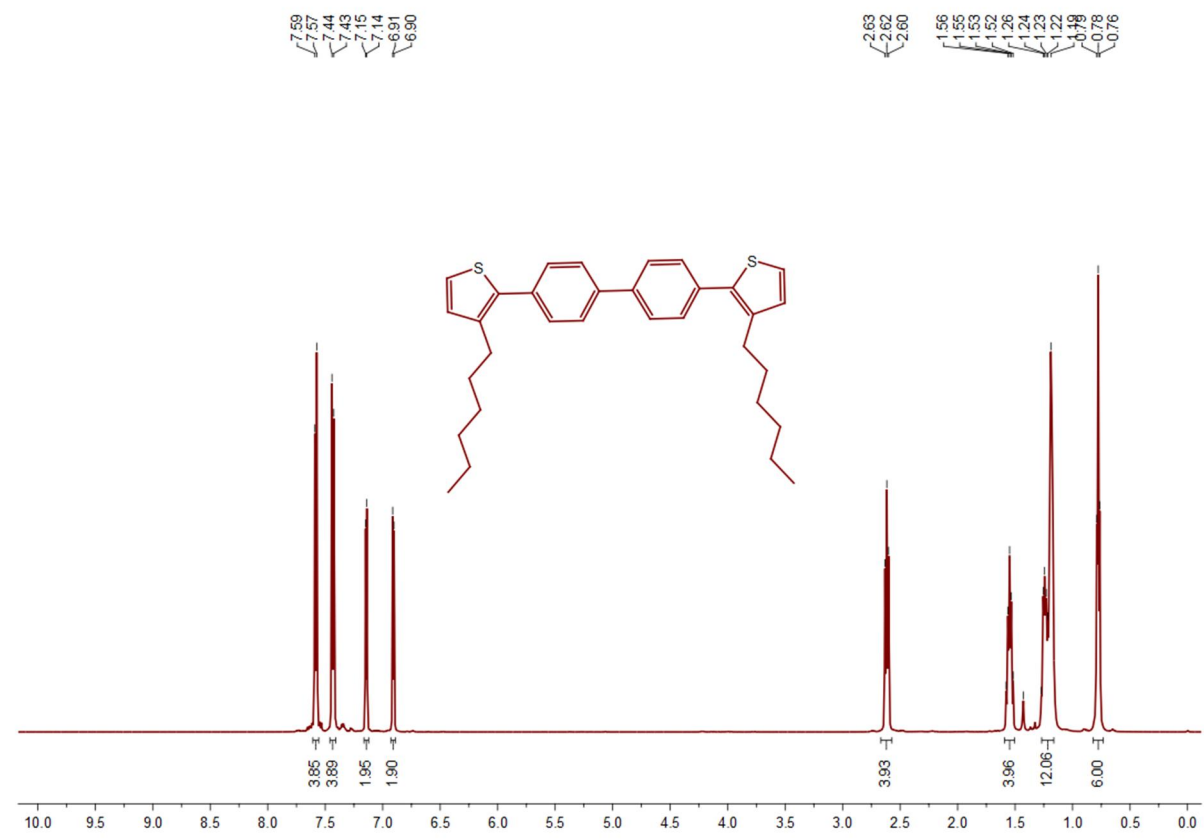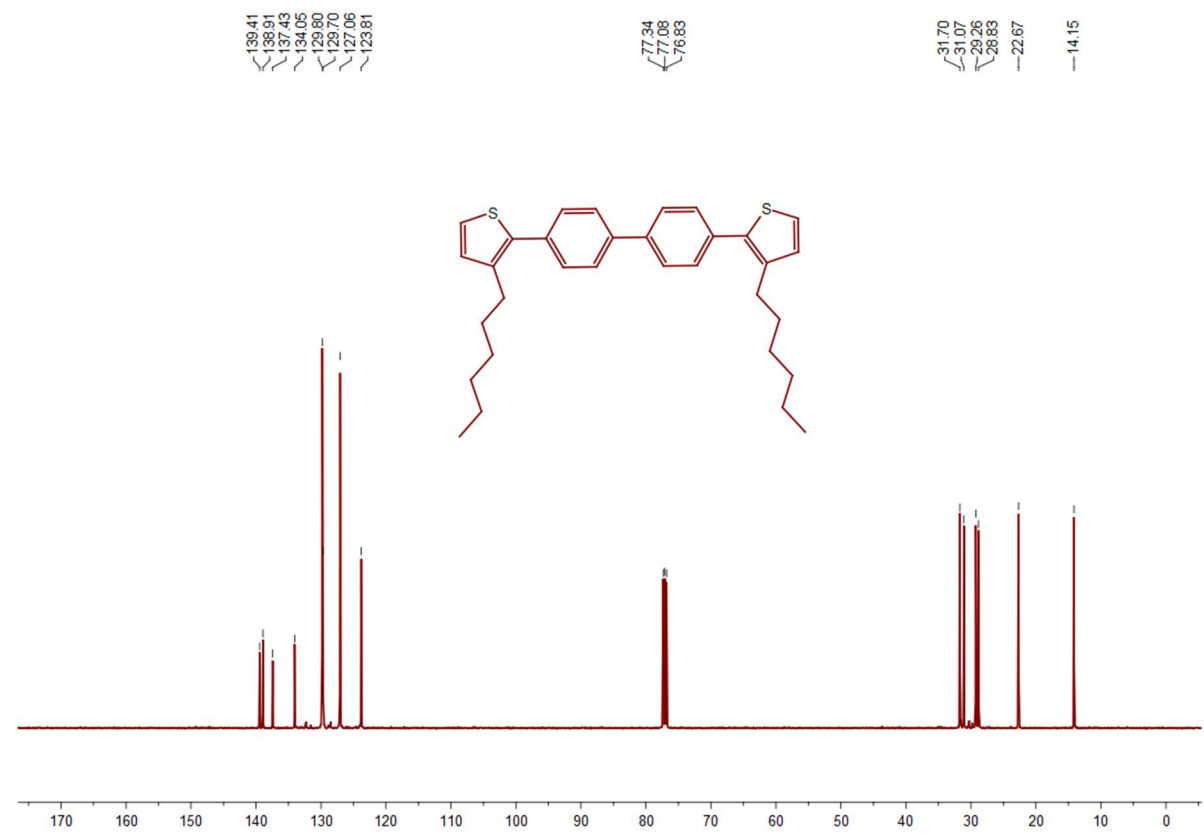

<sup>1</sup>H & <sup>13</sup>C NMR Spectrum of Compound **3e**

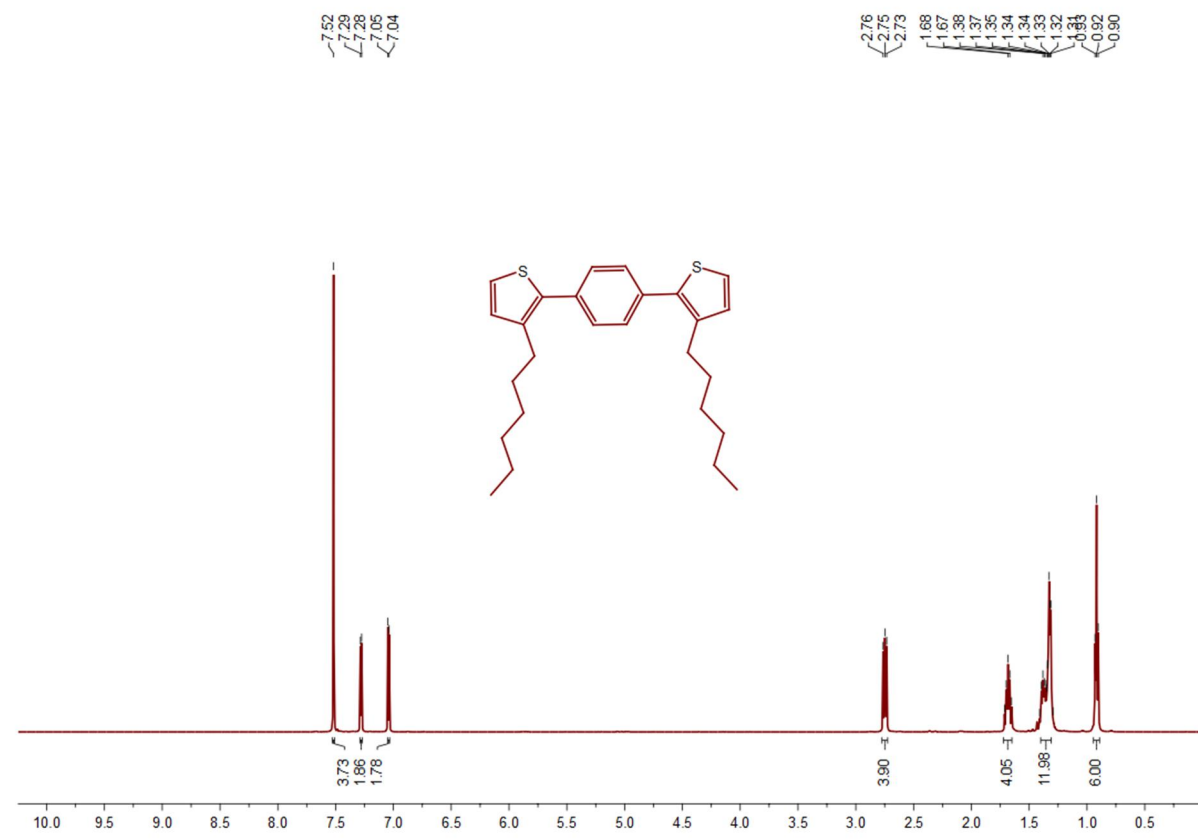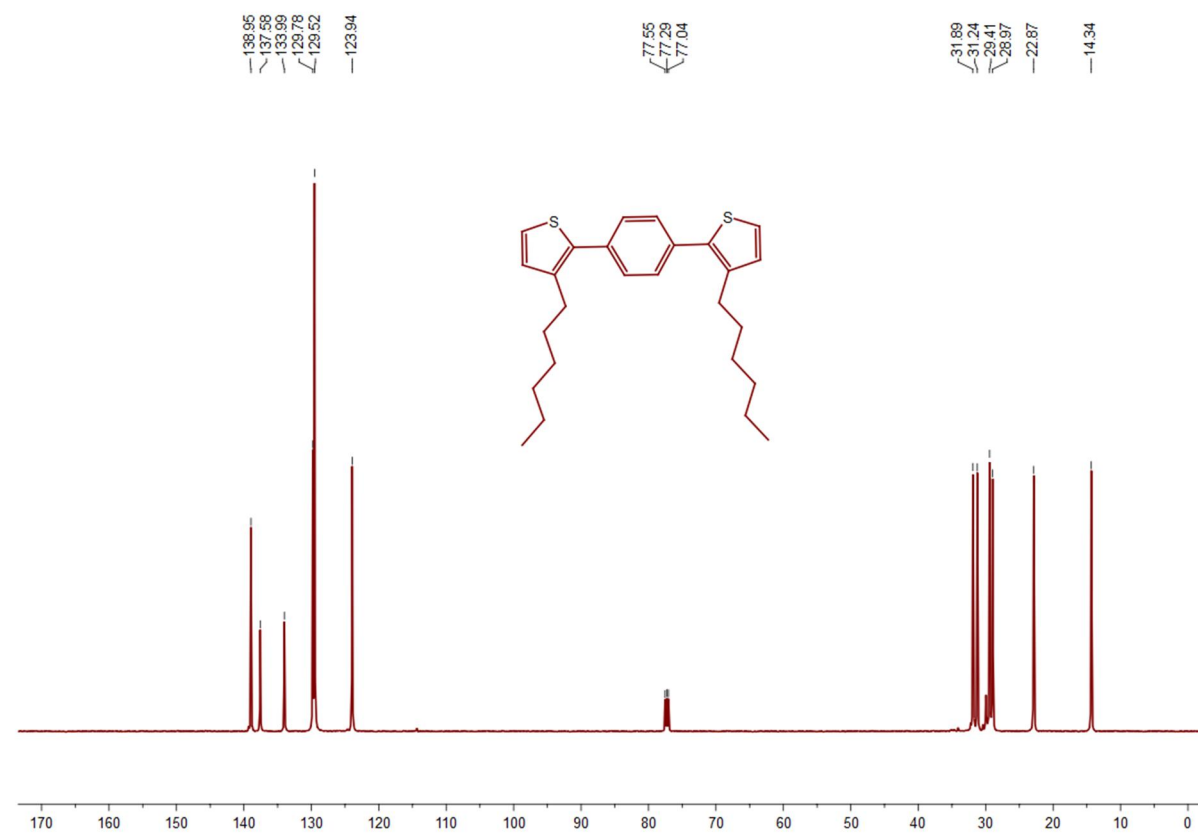

$^1\text{H}$  &  $^{13}\text{C}$  NMR Spectrum of Compound **3f**



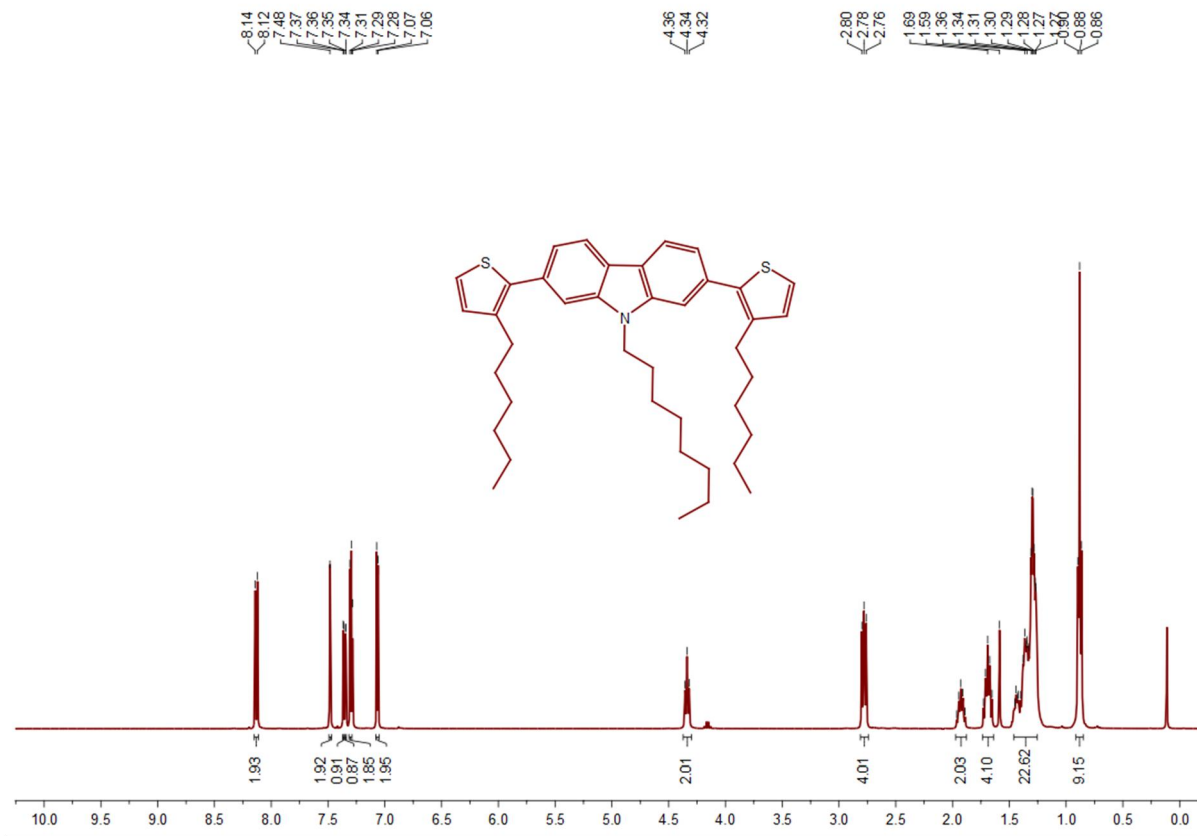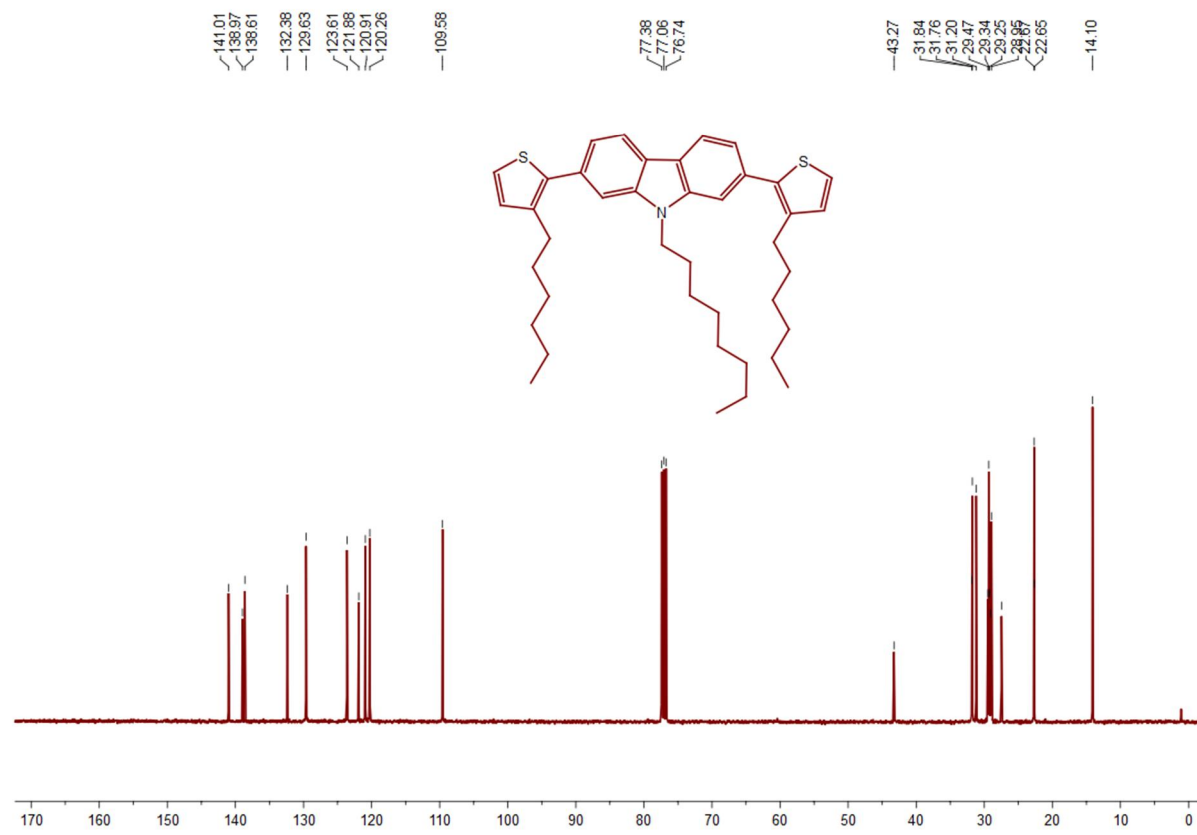

**<sup>1</sup>H & <sup>13</sup>C NMR Spectrum of Compound 3g**

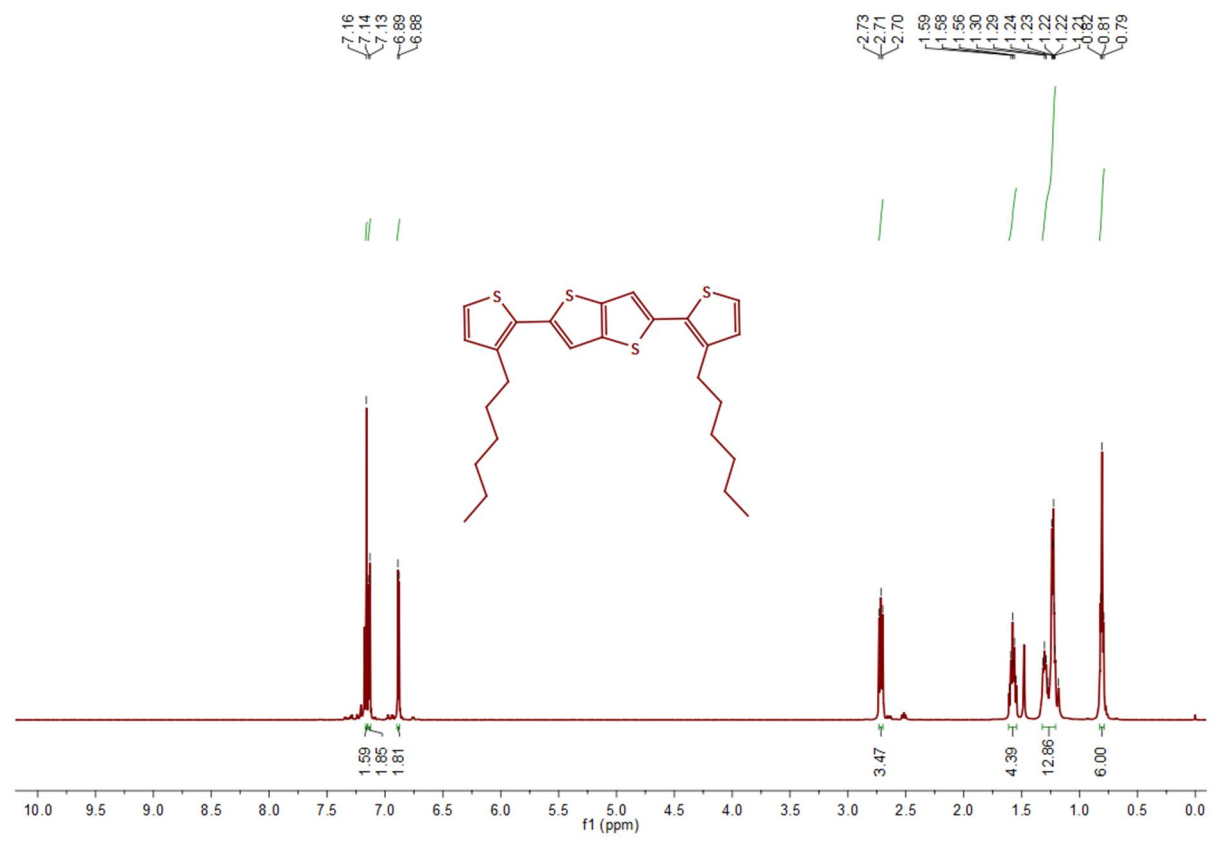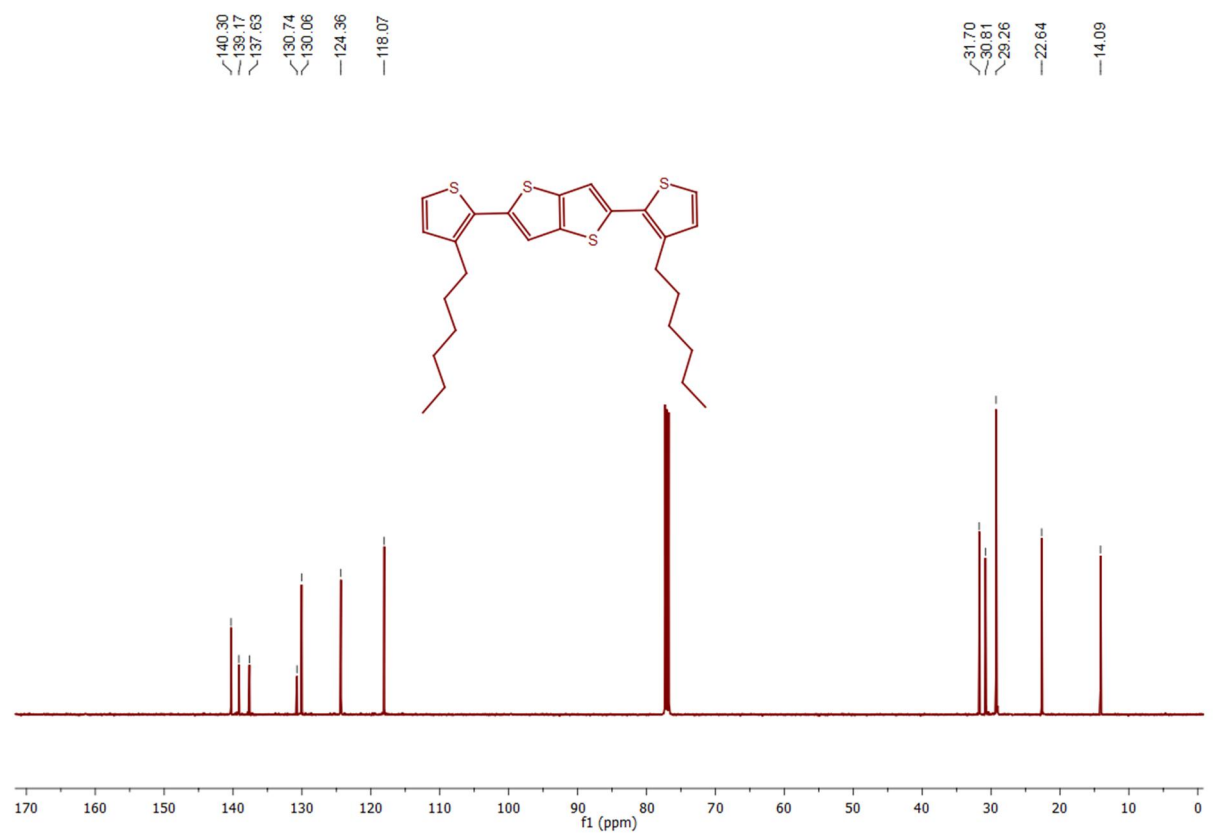

**<sup>1</sup>H & <sup>13</sup>C NMR Spectrum of Compound 3h**

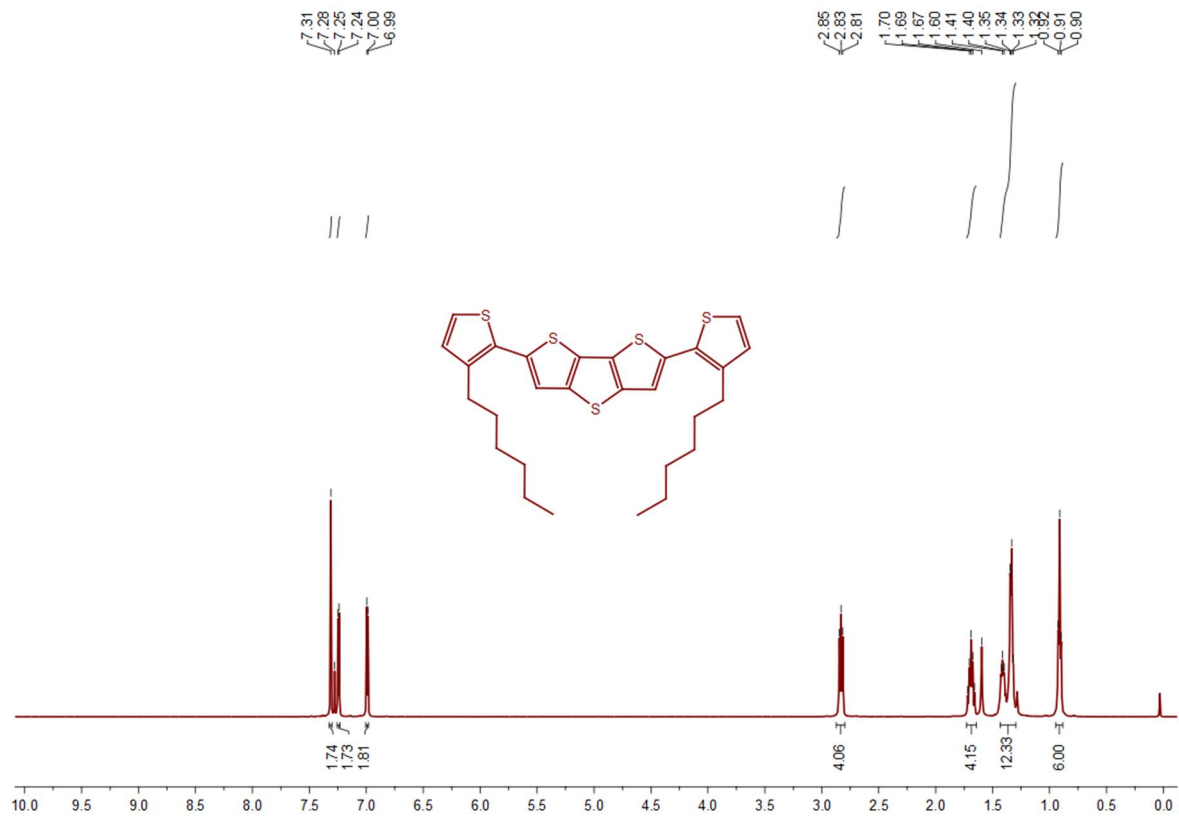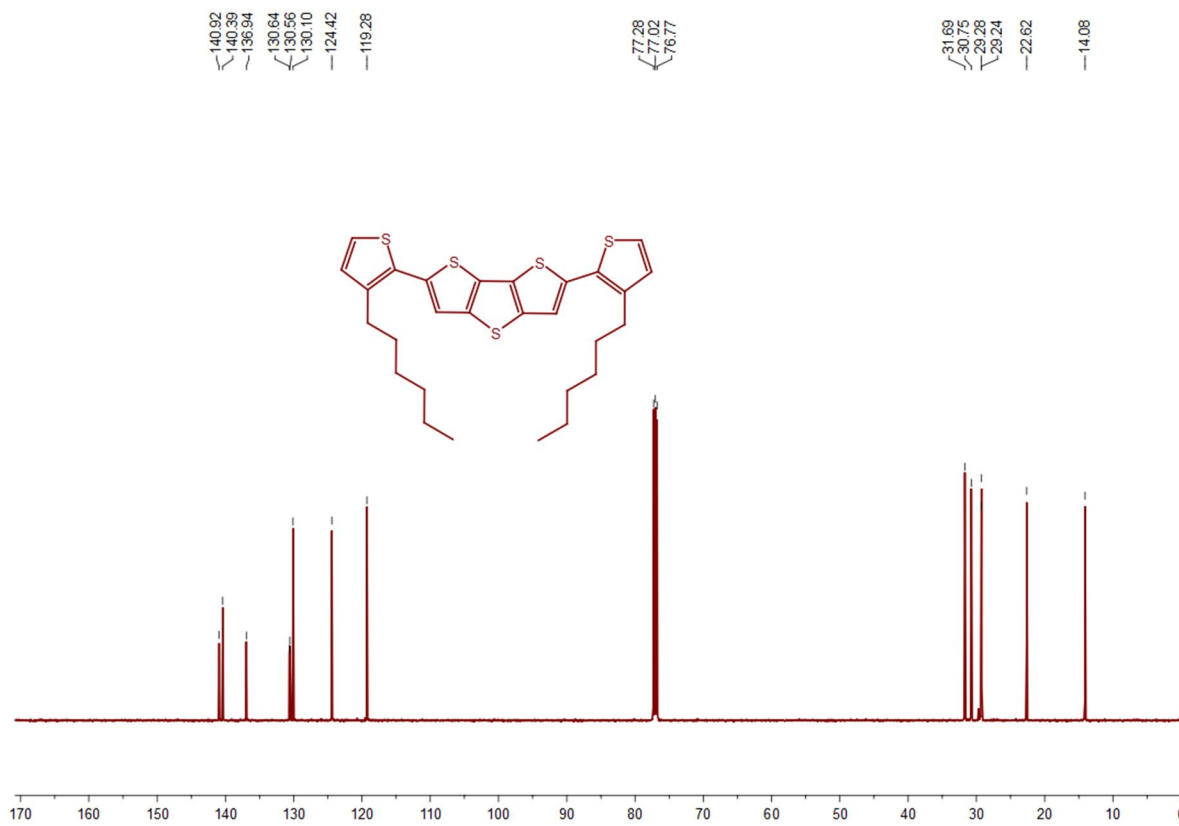

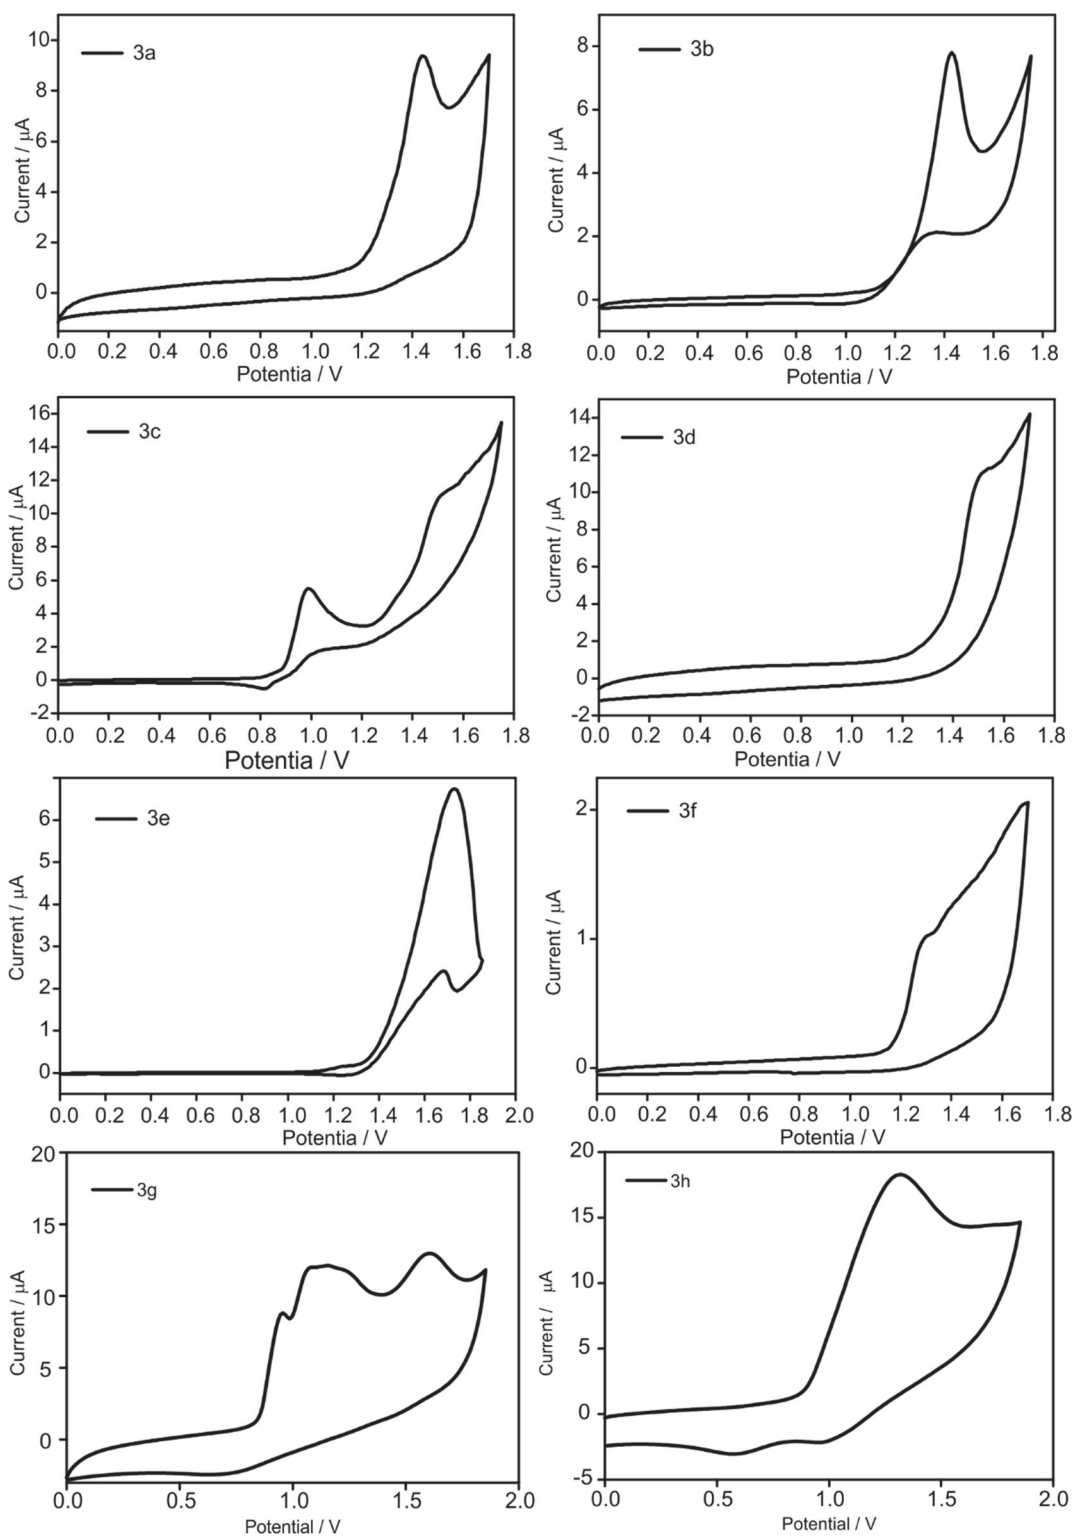

**Fig. S1** Cyclic Voltammograms of monomers **3a-h** on GC electrode in 0.1 M TBA.PF<sub>6</sub> in CH<sub>2</sub>Cl<sub>2</sub>

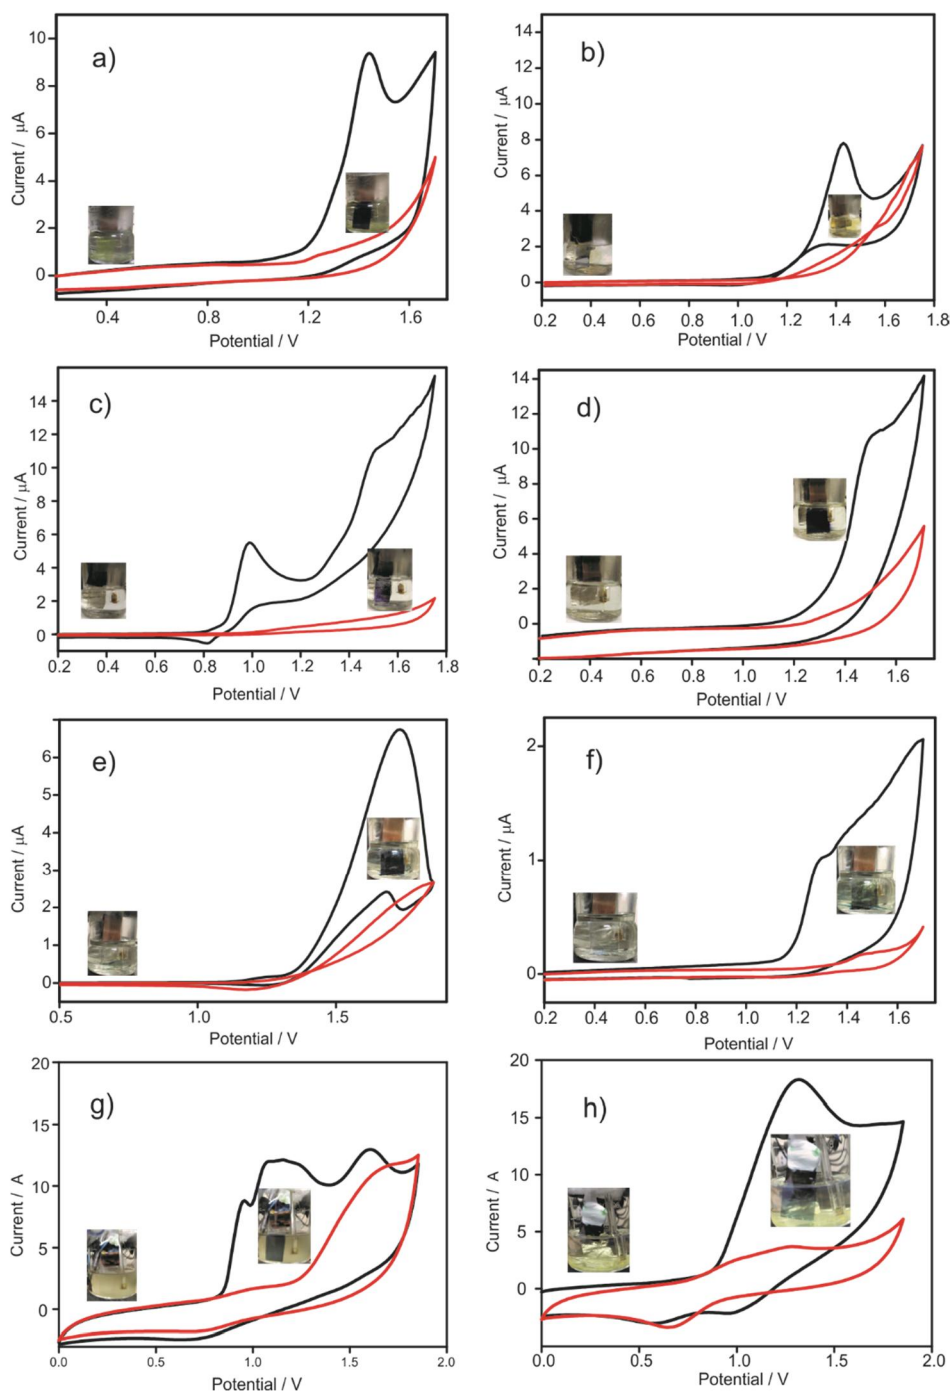

**Fig. S2** Cyclic voltammogram of monomers **3a-h** (black) numbered correspondingly and its corresponding electropolymer **4a-h** (red) in 0.1 M TBA.PF<sub>6</sub> in DCM on ITO electrode. Visual color changes upon oxidation and reduction on the ITO electrode is shown as inset.

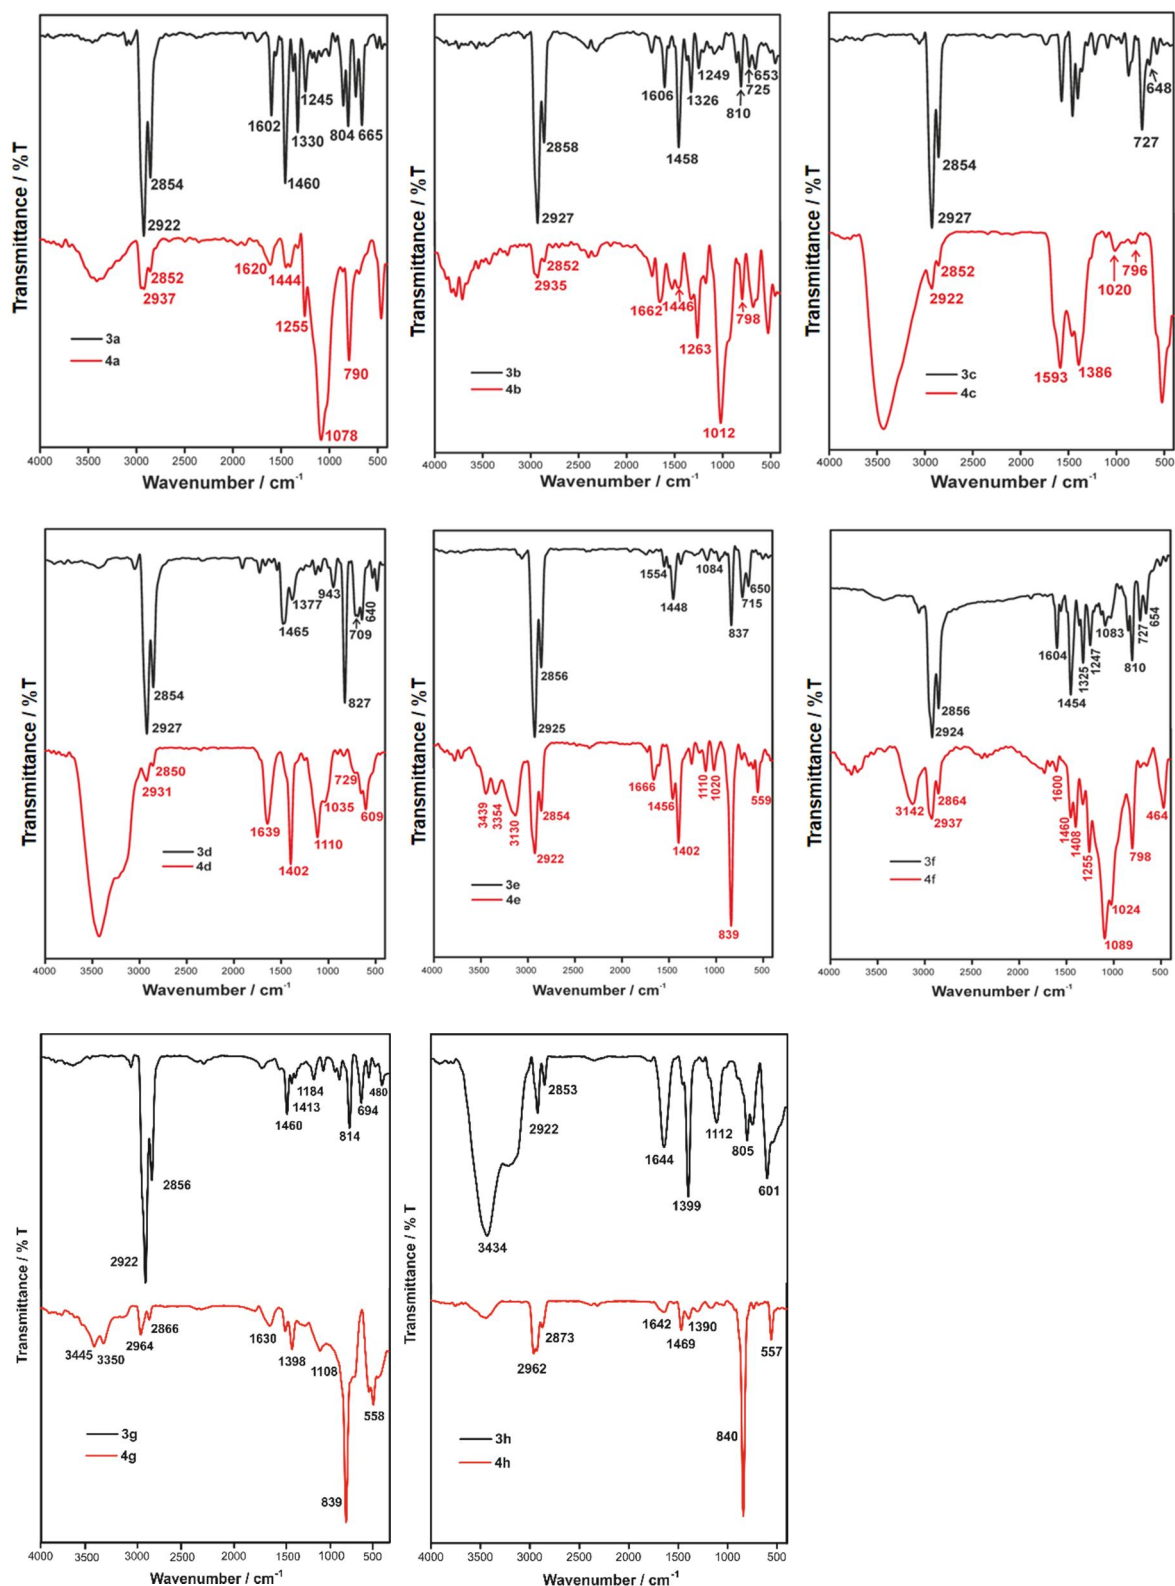

Fig. S3 FTIR spectrum of monomer **3a-3h** (black) and polymer **4a-4h** (red)

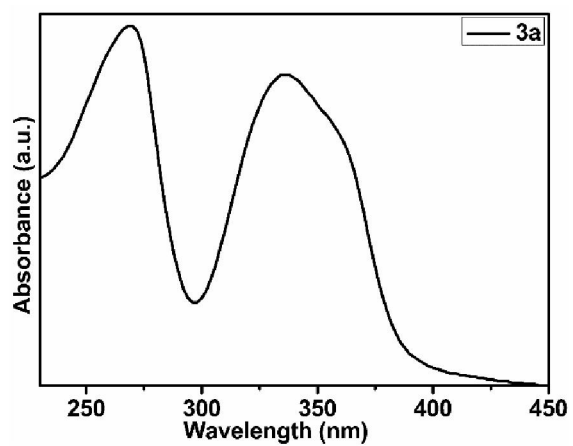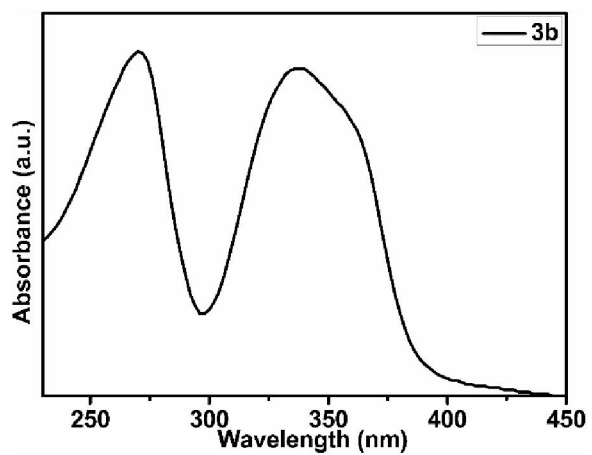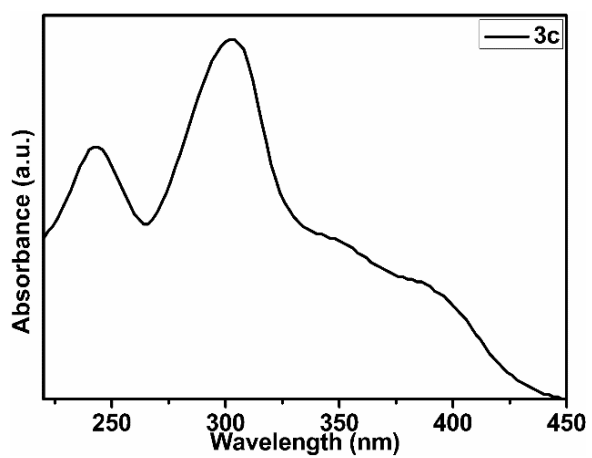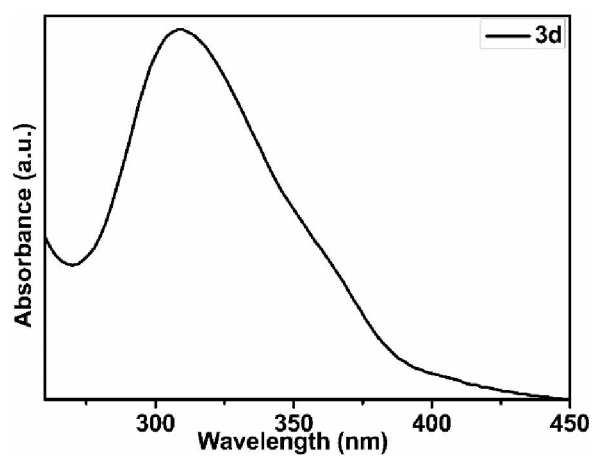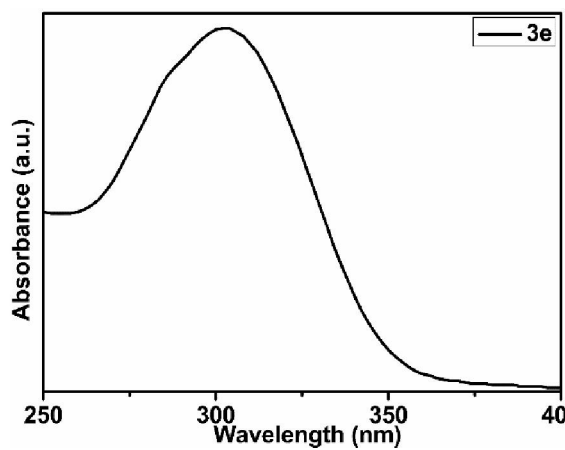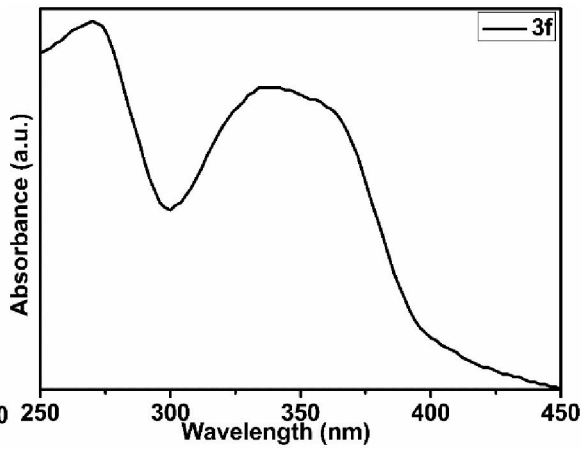

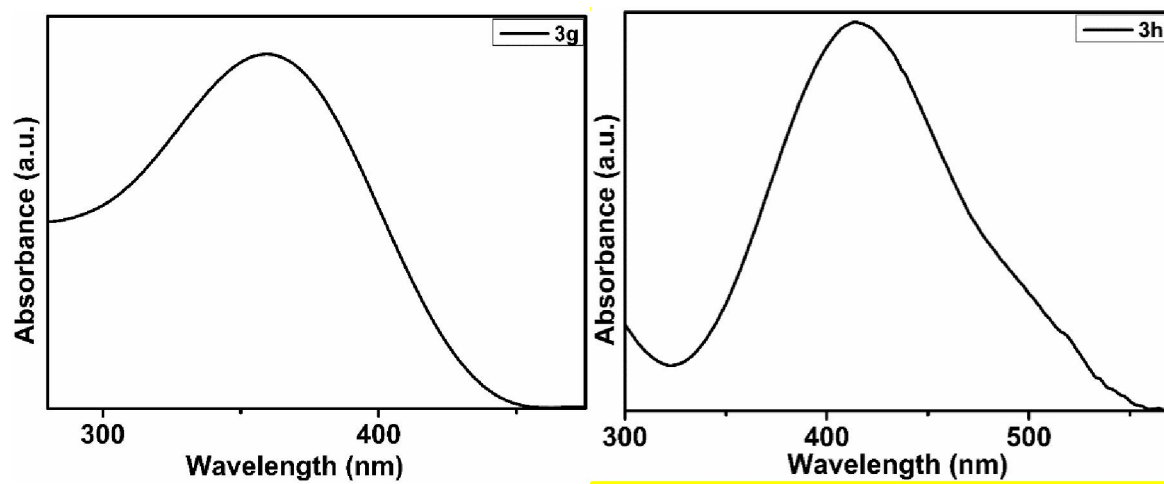

Fig. S4 UV-vis spectra of monomer **3a-3h** as thin film



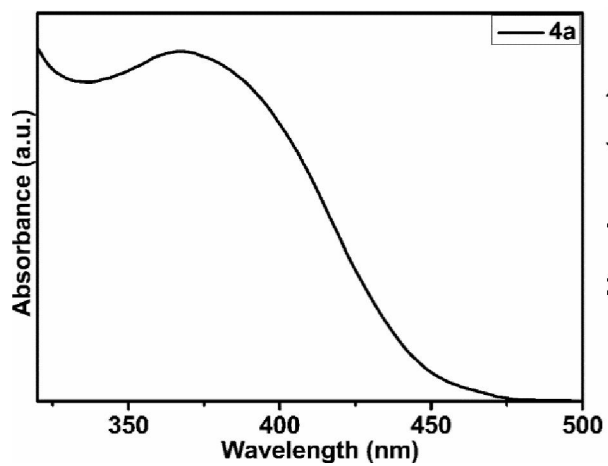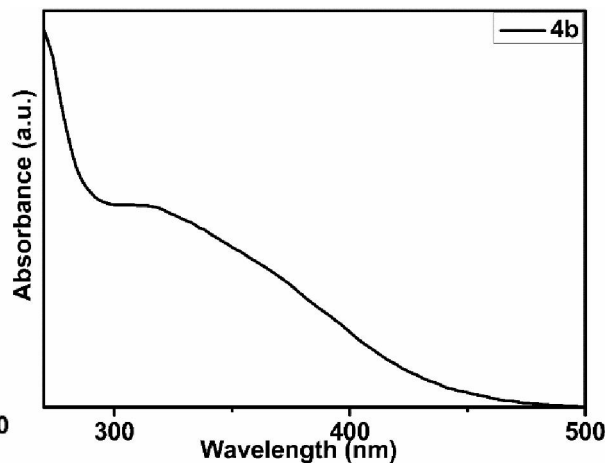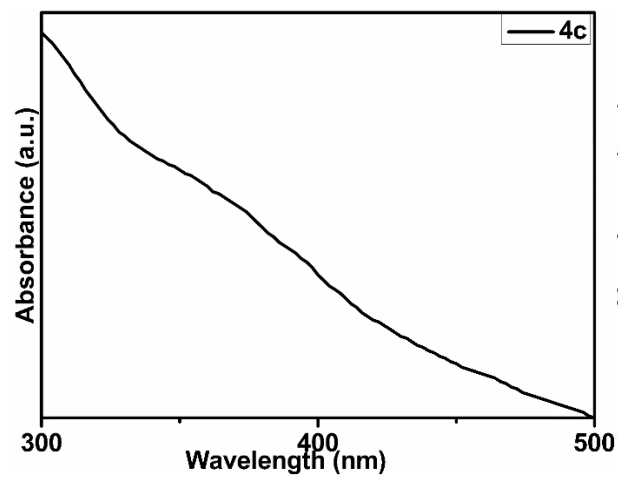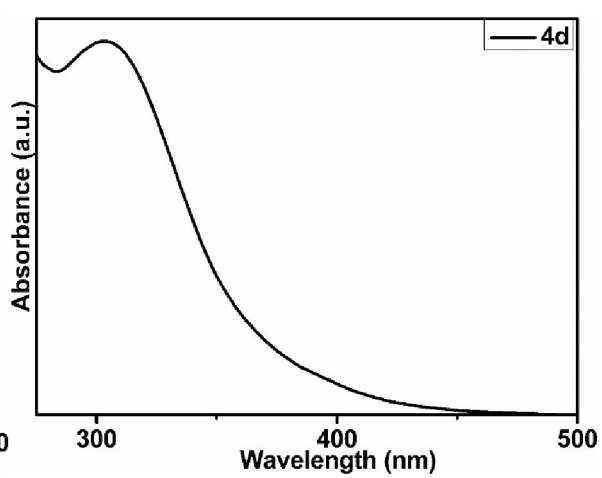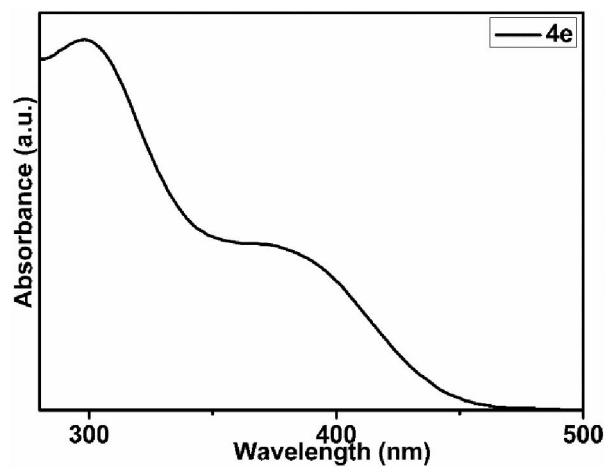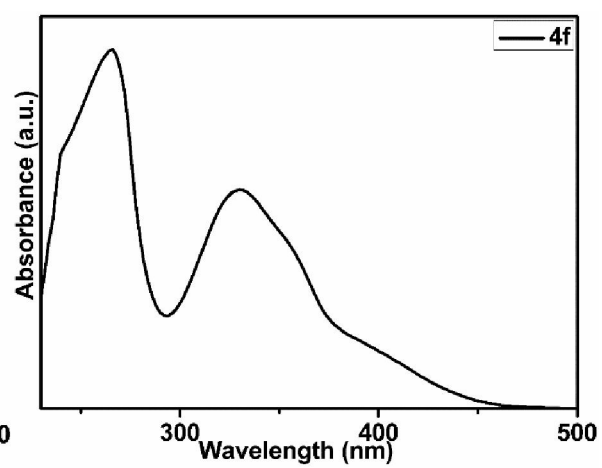

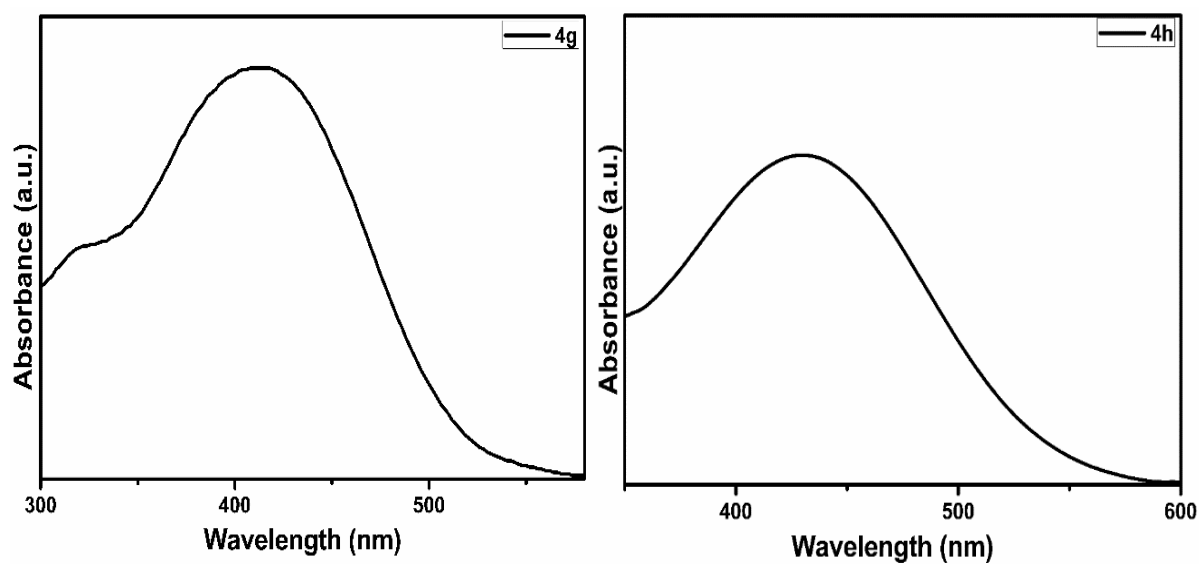

**Fig. S5** UV-Vis spectra of Polymer **4a-4h** in 1:1 DCM-THF mixture

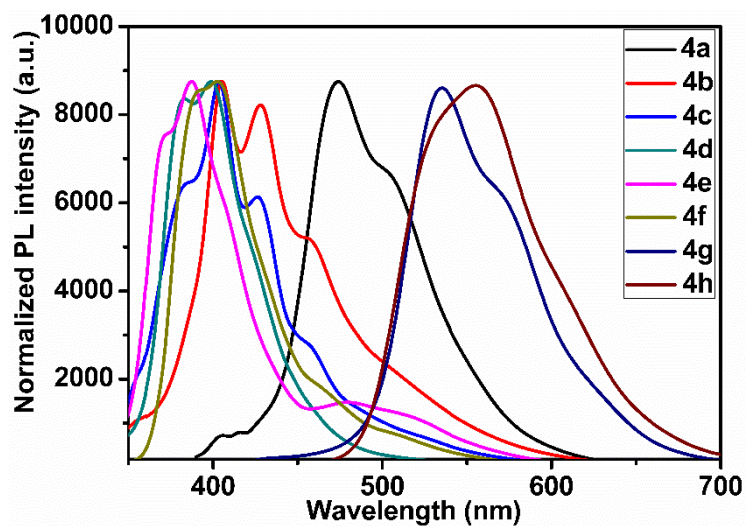

**Fig. S6** Photoluminescence spectra of polymer **4a-4h** in 1:1 DCM-THF mixture

**Table S1** Polymers PL data

| Compounds | PL- $\lambda_{em}$ (nm) | Shift (nm)        |
|-----------|-------------------------|-------------------|
| <b>4a</b> | 473                     | 550 <sup>a</sup>  |
| <b>4b</b> | 405                     | 2900 <sup>b</sup> |
| <b>4c</b> | 403                     | 2000 <sup>a</sup> |
| <b>4d</b> | 398                     | 3500 <sup>b</sup> |
| <b>4e</b> | 387                     | 4100 <sup>b</sup> |
| <b>4f</b> | 402                     | 3200 <sup>b</sup> |
| <b>4g</b> | 524                     | 5200 <sup>a</sup> |
| <b>4h</b> | 546                     | 5000 <sup>a</sup> |

<sup>a</sup>Stokes shift; <sup>b</sup>Anti-Stokes shift

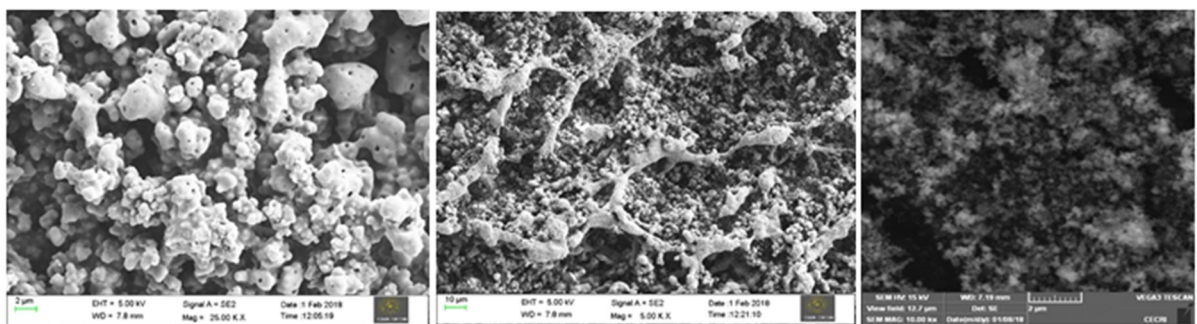

4a

4b

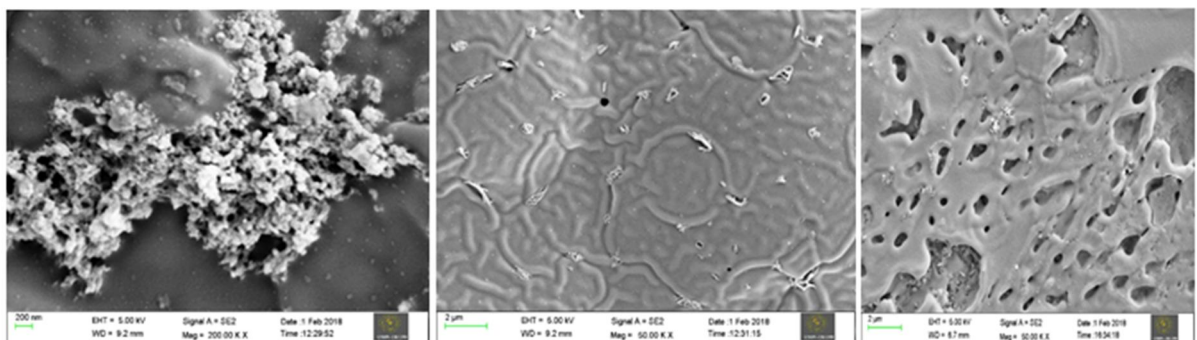

4c

4d

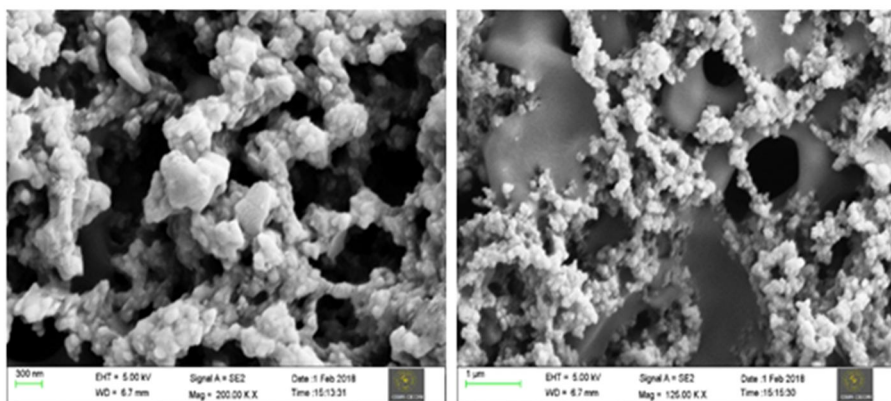

4e

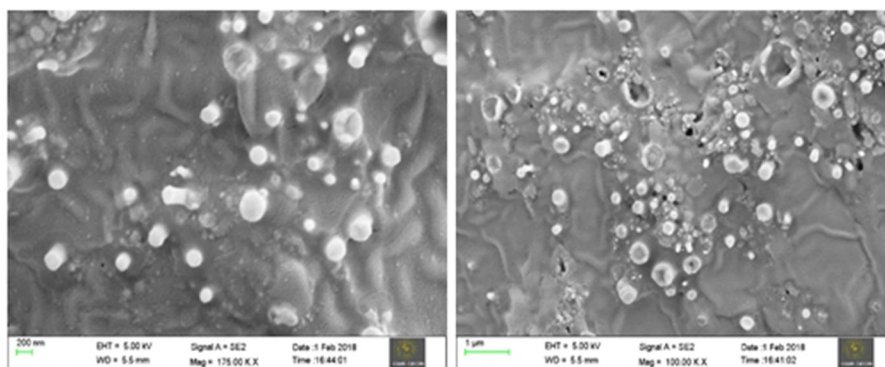

4f

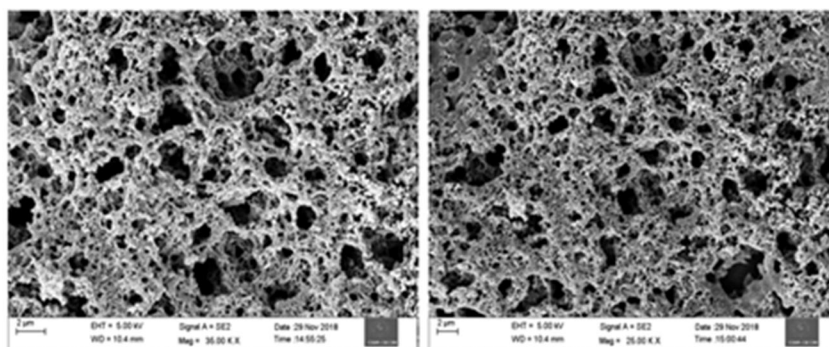

**4g**

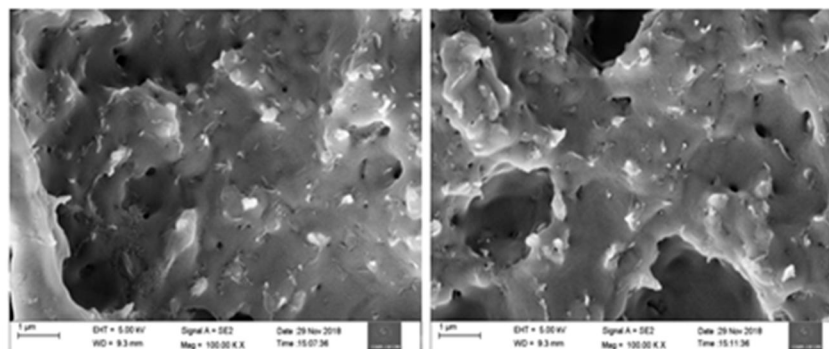

**4h**

**Fig. S7 SEM images of Polymers 4a-4h**

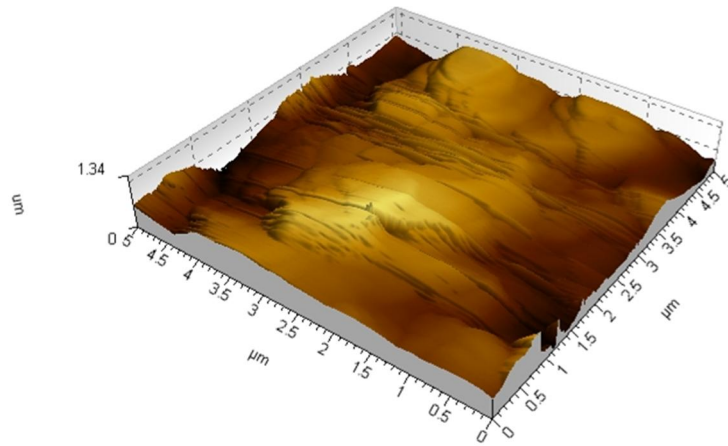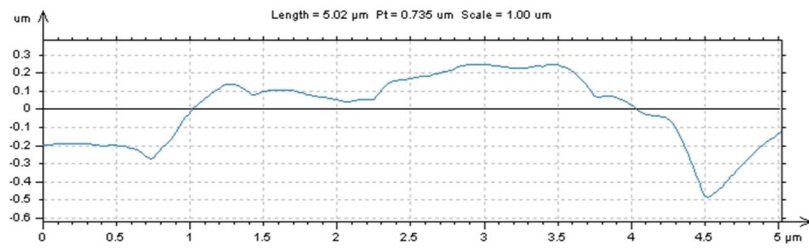

**4a**

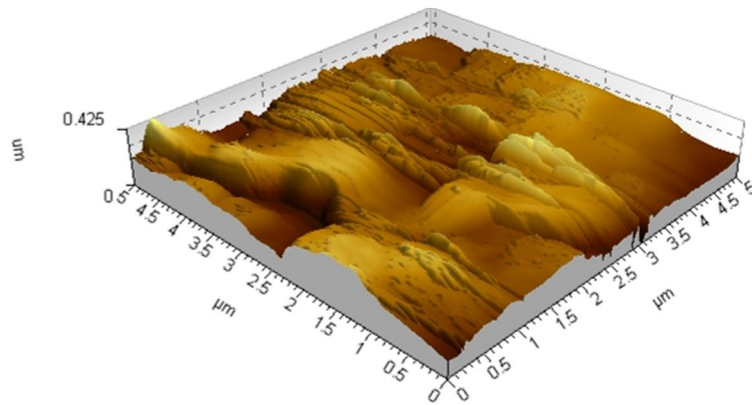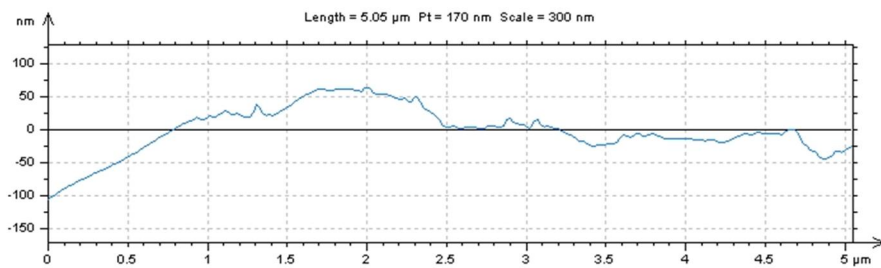

**4b**

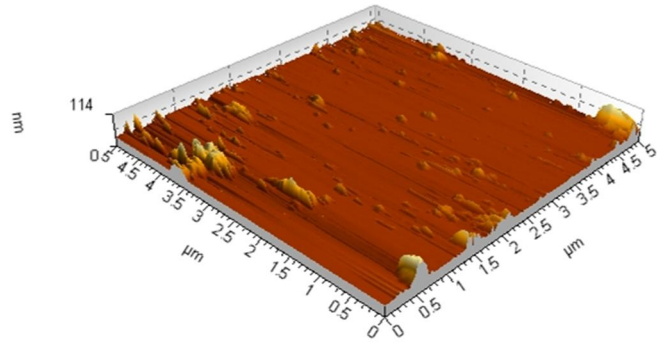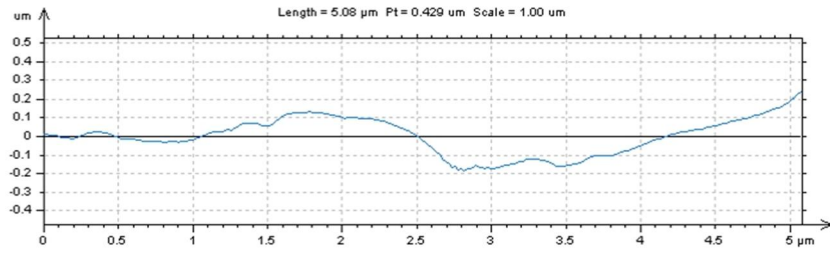

4c

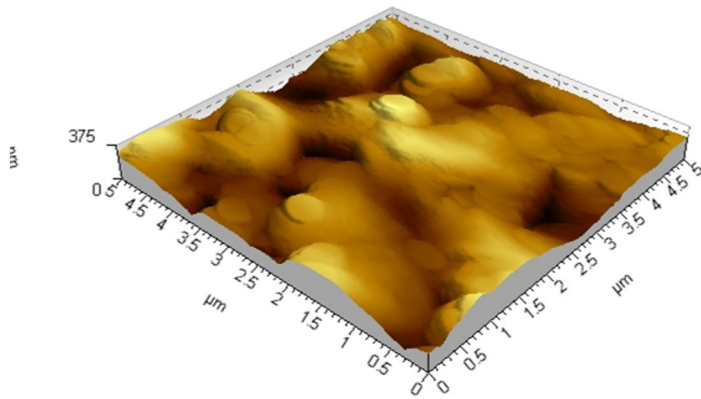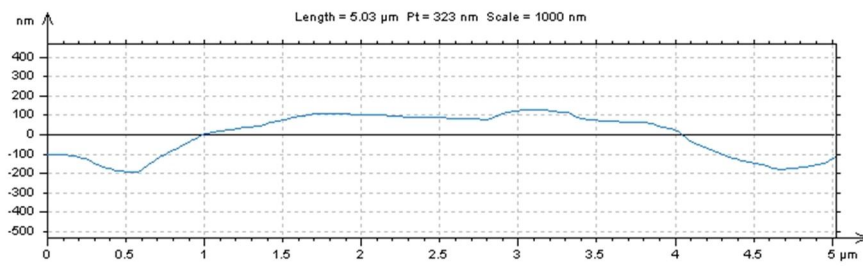

4d



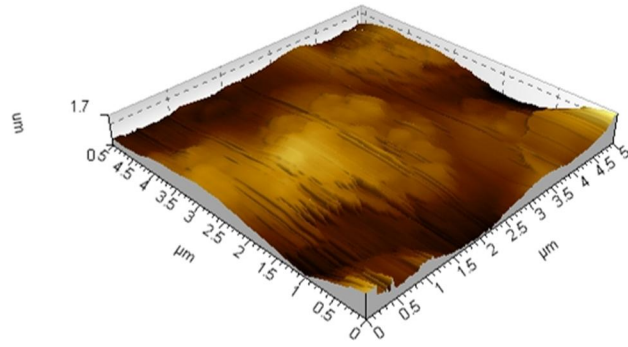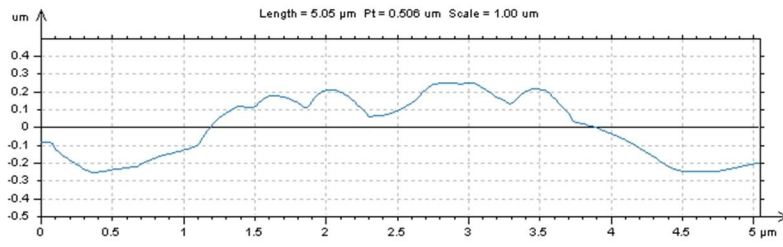

4e

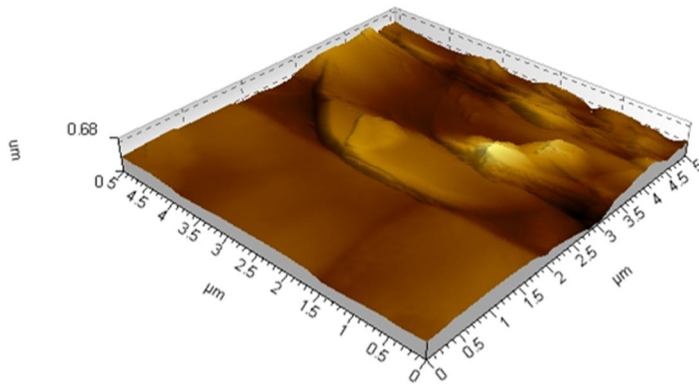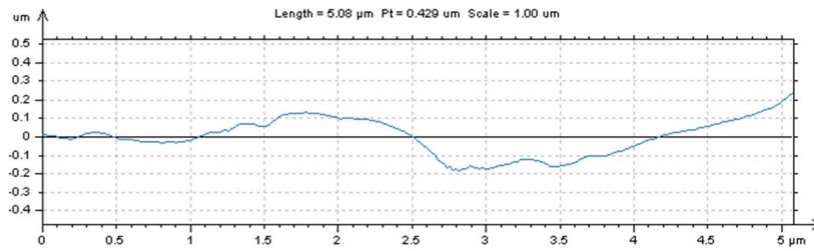

4f



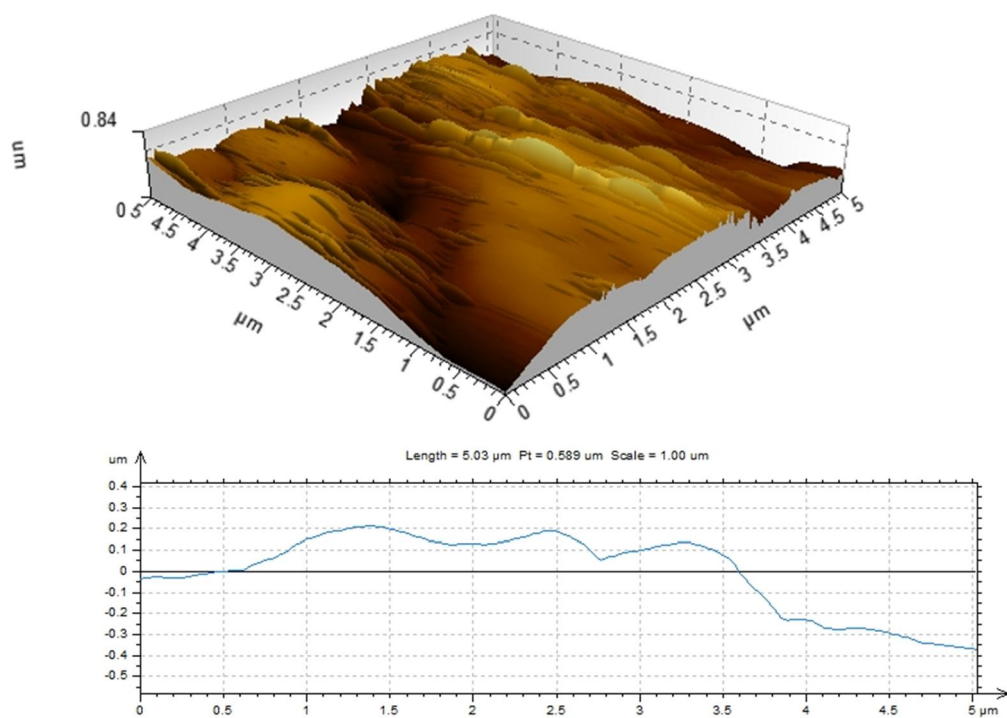

**4g**

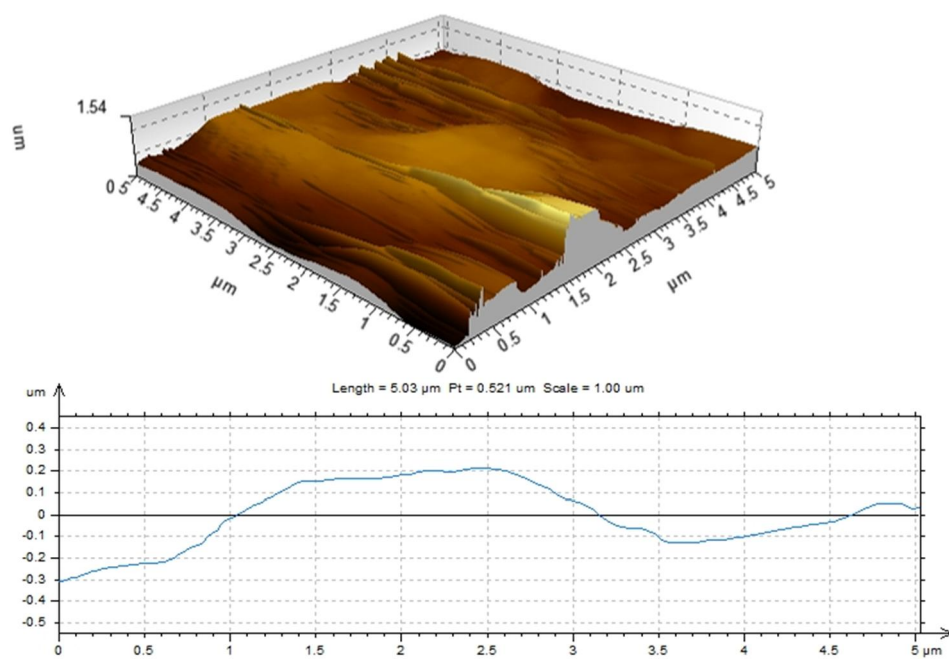

**4h**

**Fig S8 AFM image and height profile of polymers 4a-4h**

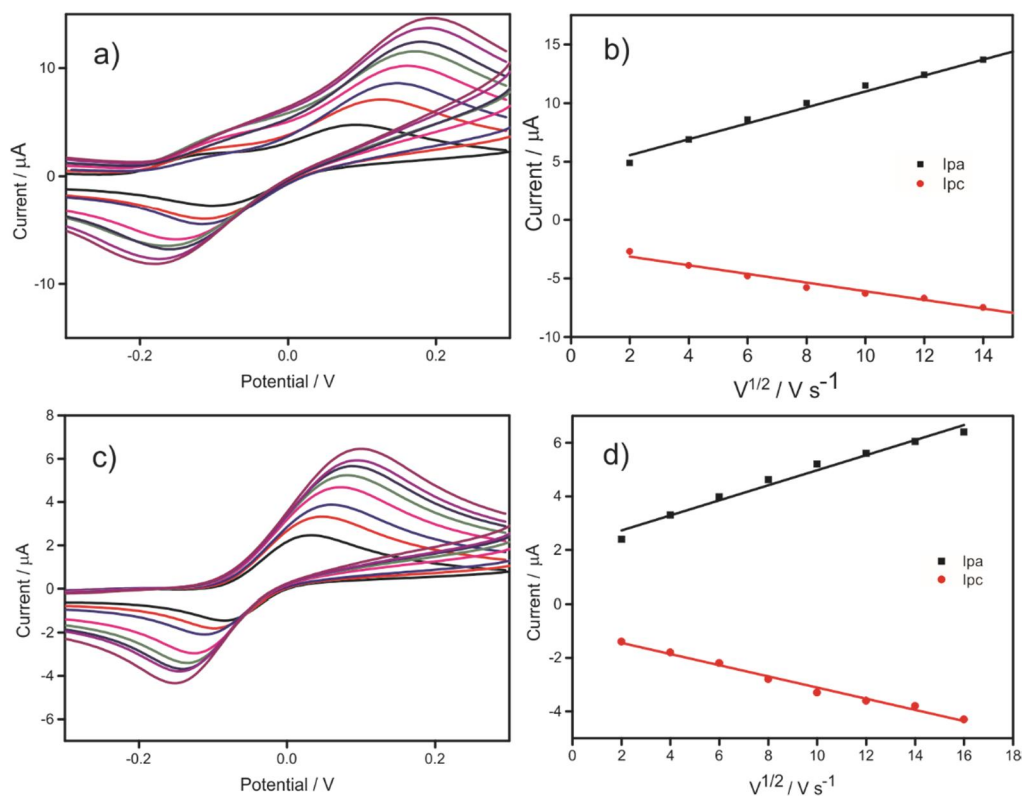

**Fig S9** Variations of current vs square root of scan rate using polymer **4g** (top) and **4h** (bottom)
